# Supplementary material
Source: bioRxiv or medRxiv preprint supplement (https://www.medrxiv.org/highwire/filestream/71223/field_highwire_adjunct_files/0/2020.01.12.20017277-1.pdf)
Supplement: Supplementary file [file 2020.01.12.20017277-1.pdf]

# Ideal Cardiovascular Health in Urban Jamaica: Prevalence Estimates and Relationship to Community Property Value, Household Assets and Educational Attainment (Supplement)

---

## **AUTHORS:**

Joette A. McKenzie<sup>1</sup>, Novie O. Younger-Coleman<sup>1</sup>, Marshall K. Tulloch-Reid<sup>1</sup>, Ishtar Govia<sup>1</sup>, Nadia R. Bennett<sup>1</sup>, Shelly R. McFarlane<sup>1</sup>, Renee Walters<sup>1</sup>, Damian K. Francis<sup>2</sup>, Karen Webster-Kerr<sup>3</sup>, Andriene Grant<sup>3</sup>, Tamu Davidson<sup>3</sup>, Rainford J. Wilks<sup>1</sup>, David R. Williams<sup>4</sup>, Trevor S. Ferguson<sup>1</sup>

## **INSTITUTIONS**

<sup>1</sup>Caribbean Institute for Health Research, The University of the West Indies, Mona, Kingston, Jamaica

<sup>2</sup>School of Health and Human Performance, Georgia College and State University, Milledgeville, GA, USA

<sup>3</sup>Ministry of Health and Wellness, Jamaica

<sup>4</sup>Department of Social and Behavioral Sciences, Harvard T. H. Chan School of Public Health, Boston, MA, USA

## **CORRESPONDENCE:**

Dr Trevor Ferguson

Epidemiology Research Unit

Caribbean Institute for Health Research

The University of the West Indies, Mona

Kingston 7, Jamaica

Tel: 927-2471

Email: [trevor.ferguson02@uwimona.edu.jm](mailto:trevor.ferguson02@uwimona.edu.jm)

## Supplementary File

**Table S1: Items Included in Household Assets List**

| Included Household Assets |                                                       |
|---------------------------|-------------------------------------------------------|
| 1.                        | Gas stove/Electric Stove                              |
| 2.                        | Refrigerator or freezer                               |
| 3.                        | Microwave oven                                        |
| 4.                        | Air conditioner                                       |
| 5.                        | Fan                                                   |
| 6.                        | Telephone (land line or cell)                         |
| 7.                        | Radio/cassette player /Stereo equipment/component set |
| 8.                        | Electronic Gaming Equipment                           |
| 9.                        | Video cassette recorder/ DVD                          |
| 10.                       | Washing machine                                       |
| 11.                       | Clothes Dryer                                         |
| 12.                       | TV sets                                               |
| 13.                       | Cable TV                                              |
| 14.                       | Water Heater (Solar or Electric)                      |
| 15.                       | Water Tank                                            |
| 16.                       | Bicycle                                               |
| 17.                       | Motorbike                                             |
| 18.                       | Car or another vehicle                                |
| 19.                       | Computer/ Tablet                                      |
| 20.                       | Computer Accessories /Printer/Fax/Scanner             |
| 21.                       | Smart Phone                                           |
| 22.                       | Internet service                                      |

**Table S2: Number and Proportion of Missing values for variables included in the analyses**

| Variable                 | Number of missing | Number of non-missing values | % missing |
|--------------------------|-------------------|------------------------------|-----------|
| Height                   | 88                | 937                          | 8.6       |
| Weight                   | 91                | 934                          | 8.9       |
| Body Mass Index          | 108               | 917                          | 10.5      |
| Systolic Blood Pressure  | 69                | 956                          | 6.7       |
| Diastolic Blood Pressure | 69                | 956                          | 6.7       |
| Fasting glucose          | 261               | 764                          | 25.5      |
| Fasting cholesterol      | 296               | 729                          | 28.9      |
| Healthy diet             | 3                 | 1,022                        | 0.3       |
| Current non-smoker       | 324               | 701                          | 31.6      |
| Physical Activity        | 64                | 961                          | 6.2       |
| Education                | 33                | 992                          | 3.2       |
| Household Assets         | 4                 | 1,021                        | 0.4       |
| Median Land Value        | 56                | 969                          | 5.5       |

**Table S3: Summary Characteristics of Urban Participants in Jamaica Health and Lifestyle Survey III by median land value tertiles**

| <b>Characteristic</b>                        | <b>n<sup>1</sup></b> | <b>Lower Tertile<br/>n = 368</b> | <b>Middle Tertile<br/>n = 368</b> | <b>Upper Tertile<br/>n = 233</b> |
|----------------------------------------------|----------------------|----------------------------------|-----------------------------------|----------------------------------|
| <i>Mean for Continuous Variables</i>         |                      |                                  |                                   |                                  |
|                                              |                      | <i>Mean ± SD</i>                 | <i>Mean ± SD</i>                  | <i>Mean ± SD</i>                 |
| Age (years)                                  | 969                  | 45.8 ± 17.5                      | 46.8 ± 17.4                       | 49.2 ± 17.7                      |
| Height (cm)*                                 | 886                  | 164.8 ± 9.2                      | 166.2 ± 9.5                       | 164.1 ± 9.9                      |
| Weight (kg)                                  | 886                  | 80.5 ± 29.2                      | 78.2 ± 20.6                       | 78.1 ± 25.1                      |
| BMI (kg/m <sup>2</sup> )                     | 869                  | 29.6 ± 11.0                      | 28.5 ± 8.0                        | 29.2 ± 9.7                       |
| Systolic Blood Pressure (mmHg)               | 905                  | 130.8 ± 22.6                     | 130.6 ± 22.2                      | 130.3 ± 21.5                     |
| Diastolic Blood Pressure                     | 905                  | 84.3 ± 13.0                      | 83.8 ± 13.1                       | 83.3 ± 12.5                      |
| Fasting Glucose                              | 718                  | 5.8 ± 1.8                        | 5.7 ± 1.9                         | 5.9 ± 2.1                        |
| Total Cholesterol                            | 684                  | 4.3 ± 1.1                        | 4.5 ± 1.1                         | 4.6 ± 1.0                        |
| <i>Proportions for Categorical Variables</i> |                      |                                  |                                   |                                  |
|                                              |                      | % (n)                            | % (n)                             | % (n)                            |
| Cigarette Smoking                            | 636                  | 13.9 (33)                        | 10.4 (25)                         | 7.6 (12)                         |
| Education***                                 | 942                  |                                  |                                   |                                  |
| <i>Less than High School</i>                 |                      | 21.8 (78)                        | 24.4 (87)                         | 26.4 (60)                        |
| <i>High School</i>                           |                      | 60.1 (215)                       | 46.8 (167)                        | 44.1 (100)                       |
| <i>More than High School</i>                 |                      | 18.2 (65)                        | 28.9 (103)                        | 29.5 (67)                        |
| Household Assets***                          | 965                  |                                  |                                   |                                  |
| <i>Lower Tertile (≤ 9 items)</i>             |                      | 43.3 (159)                       | 36.3 (133)                        | 41.4 (96)                        |
| <i>Middle Tertile (10 – 12 items)</i>        |                      | 36.0 (132)                       | 30.9 (113)                        | 25.0 (58)                        |
| <i>Upper Tertile (13 – 22 items)</i>         |                      | 20.7 (76)                        | 32.8 (120)                        | 33.6 (78)                        |

\*p<0.05; \*\*p<0.01; \*\*\*p<0.001 for MLV tertile differences

<sup>1</sup>n = number of available values for each variable

IQR = inter-quartile range

**Table S4A: Mean number of Ideal Cardiovascular Health (ICH) Characteristics, Prevalence of Five or More ICH Characteristics and Individual ICH Components among of Urban Participants in Jamaica Health and Lifestyle Survey III by Median Land Value Category**

| <b>Characteristic</b>                     | <b>Lower Tertile of MLV<br/>n = 385</b> | <b>Middle Tertile of MLV<br/>n = 384</b> | <b>Upper Tertile of MLV<br/>n = 256</b> |
|-------------------------------------------|-----------------------------------------|------------------------------------------|-----------------------------------------|
| Mean number of ICH characteristics        | 3.5 (3.4, 3.7)                          | 3.6 (3.4, 3.7)                           | 3.7 (3.4, 3.9)                          |
| 5 or more ICH characteristics             | 20.2 (14.6, 25.9)                       | 21.4 (15.1, 27.8)                        | 28.7 (21.0, 36.3)                       |
| All 4 ICH – Health Behaviours             | 1.2 (0, 2.7) **                         | 3.8 (1.0, 6.6)                           | 8.1 (3.7, 12.4)                         |
| All 4 ICH – Health Factors                | 15.0 (9.2, 20.8)                        | 13.2 (7.7, 18.7)                         | 14.8 (9.5, 20.2)                        |
| Normal Blood Pressure (<120/80 mmHg)      | 31.6 (24.9, 38.3)                       | 27.3 (20.7, 33.9)                        | 27.3 (21.2, 33.5)                       |
| Normal BMI (<25 kg/m <sup>2</sup> )       | 27.0 (20.2, 33.9)                       | 32.5 (24.7, 40.2)                        | 33.7 (25.8, 41.5)                       |
| Normal Glucose (<5.6 mmol/l)              | 54.3 (45.2, 63.5)                       | 52.4 (43.0, 61.8)                        | 55.0 (45.9, 64.1)                       |
| Normal Cholesterol (<5.2 mmol/l)          | 83.5 (75.2, 91.9) *                     | 77.7 (70.7, 84.7)                        | 69.5 (62.1, 76.8)                       |
| Physical Activity ≥150 min/week           | 58.1 (49.2, 66.9)                       | 57.5 (49.6, 65.4)                        | 62.8 (54.4, 71.2)                       |
| Healthy Diet (≥3 of four dietary factors) | 13.6 (8.8, 18.5) **                     | 21.7 (18.2, 25.2)                        | 26.0 (19.7, 32.4)                       |
| Current Non-Smoker                        | 83.4 (77.6, 89.2)                       | 86.4 (79.5, 93.3)                        | 90.8 (85.8, 95.7)                       |

Values reported are given as percentages with 95% confidence intervals in brackets except for mean number of ICH characteristics which is given as number with 95% CI in brackets

MLV = Median Land Value

ICH = ideal cardiovascular health; ICH includes 7 characteristics (current non-smoking, healthy diet, moderate physical activity, and normal body mass index, blood pressure, glucose, and cholesterol)

ICH – Health Behaviours include adequate physical activity, non-smoker, normal BMI and healthy diet; ICH Health Factors include normal blood pressure, normal glucose, normal cholesterol and current-non-smoker).

Healthy diet defined as meeting 3 or 4 of criteria: (1) adequate fruit and vegetable intake, (2) adequate fish intake (3) low salt diet, (4) low sugar sweetened beverage consumption

\*p<0.05; \*\*p<0.01; \*\*\*p<0.001 for difference in proportion compared to the Upper MLV Tertile

**Table S4B: Mean number of Ideal Cardiovascular Health Characteristics, Prevalence of Five or More ICH Characteristics and Individual ICH Components among of Urban Participants in Jamaica Health and Lifestyle Survey III by Tertiles of Household Assets**

| Characteristic                            | Lower Tertile of Household Assets | Middle Tertile of Household Assets | Upper Tertile of Household Assets |
|-------------------------------------------|-----------------------------------|------------------------------------|-----------------------------------|
|                                           | n = 423                           | n = 317                            | n = 285                           |
| Mean number of ICH characteristics        | 3.4 (3.2, 3.6)                    | 3.7 (3.5, 3.9)                     | 3.6 (3.4, 3.8)                    |
| 5 or more ICH characteristics             | 18.9 (13.7, 24.1)                 | 27.9 (20.0, 35.7)                  | 22.4 (16.2, 28.7)                 |
| All 4 ICH – Health Behaviours             | 2.6 (0.7, 4.5)                    | 6.5 (1.5, 11.5)                    | 3.4 (1.1, 5.8)                    |
| All 4 ICH – Health Factors                | 13.0 (7.8, 18.2)                  | 14.9 (9.2, 20.6)                   | 14.7 (8.3, 21.1)                  |
| Normal Blood Pressure (<120/80 mmHg)      | 26.1 (20.1, 32.1)                 | 29.7 (23.9, 35.5)                  | 30.2 (23.3, 37.1)                 |
| Normal BMI (<25 kg/m <sup>2</sup> )       | 27.4 (20.4, 34.4)                 | 37.9 (29.5, 46.4)                  | 28.4 (21.0, 35.9)                 |
| Normal Glucose (<5.6 mmol/l)              | 54.4 (46.2, 62.6)                 | 52.6 (43.6, 61.5)                  | 53.9 (44.9, 63.0)                 |
| Normal Cholesterol (<5.2 mmol/l)          | 76.6 (69.7, 83.6)                 | 79.0 (71.9, 86.1)                  | 76.6 (68.8, 84.4)                 |
| Physical Activity ≥150 min/week           | 60.2 (53.4, 67.1)                 | 66.0 (58.2, 73.9) *                | 51.5 (41.3, 61.7)                 |
| Healthy Diet (≥3 of four dietary factors) | 16.8 (12.4, 21.2) *               | 16.8 (11.5, 22.1) *                | 27.3 (23.0, 31.6)                 |
| Current Non-Smoker                        | 80.4 (74.2, 86.5) *               | 86.9 (81.0, 92.9)                  | 92.6 (87.2, 98.1)                 |

Values reported are given as percentages with 95% confidence intervals in brackets except for mean number of ICH characteristics which is given as number with 95% CI in brackets

ICH = ideal cardiovascular health; ICH includes 7 characteristics (current non-smoking, healthy diet, moderate physical activity, and normal body mass index, blood pressure, glucose, and cholesterol)

ICH – Health Behaviours include adequate physical activity, non-smoker, normal BMI and healthy diet; ICH Health Factors include normal blood pressure, normal glucose, normal cholesterol and current-non-smoker). Healthy diet defined as meeting 3 or 4 of criteria: (1) adequate fruit and vegetable intake, (2) adequate fish intake (3) low salt diet, (4) low sugar sweetened beverage consumption

\*p<0.05; \*\*p<0.01; \*\*\*p<0.001 for difference in proportion compared to the Upper Household Assets Tertile

**Table S4C: Mean number of Ideal Cardiovascular Health (ICH) Characteristics, Prevalence of Five or More ICH Characteristics and Individual ICH Components among of Urban Participants in Jamaica Health and Lifestyle Survey III by Educational Attainment Category**

| Characteristic                            | Less than High School | High School         | More than High School |
|-------------------------------------------|-----------------------|---------------------|-----------------------|
| <b>Male</b>                               | <b>n = 111</b>        | <b>n = 182</b>      | <b>n = 67</b>         |
| Mean number of ICH characteristics        | 3.2 (2.9, 3.6)        | 3.8 (3.5, 4.1)      | 3.4 (3.0, 3.8)        |
| 5 or more ICH characteristics             | 16.8 (7.3, 26.2)      | 30.9 (20.1, 41.8)   | 15.5 (4.8, 26.1)      |
| All 4 ICH – Health Behaviours             | 3.0 (0, 6.3)          | 7.7 (2.2, 13.1)     | 6.1 (0, 12.7)         |
| All 4 ICH – Health Factors                | 1.4 (0, 4.3)          | 14.9 (5.6, 24.1)    | 7.5 (0, 15.0)         |
| Normal Blood Pressure (<120/80 mmHg)      | 8.2 (1.4, 15.1)       | 26.2 (16.2, 36.3)   | 17.2 (6.9, 27.5)      |
| Normal BMI (<25 kg/m <sup>2</sup> )       | 36.9 (25.4, 48.3)     | 44.9 (33.1, 56.8)   | 30.1 (15.8, 44.3)     |
| Normal Glucose (<5.6 mmol/l)              | 44.0 (30.3, 57.6)     | 56.3 (42.5, 70.0)   | 52.8 (37.5, 68.0)     |
| Normal Cholesterol (<5.2 mmol/l)          | 67.0 (52.7, 81.2)     | 83.3 (74.1, 92.6)   | 76.4 (61.7, 91.2)     |
| Physical Activity ≥150 min/week           | 69.4 (59.8, 79.1)     | 69.5 (63.6, 75.5)   | 61.7 (45.4, 78.1)     |
| Healthy Diet (≥3 of four dietary factors) | 25.6 (14.8, 36.4) *   | 19.0 (12.6, 25.4)   | 13.7 (6.2, 21.2)      |
| Current Non-Smoker                        | 71.0 (58.6, 83.3)     | 78.5 (68.0, 89.0)   | 88.7 (77.8, 99.6)     |
| <b>Female</b>                             | <b>n = 143</b>        | <b>n = 343</b>      | <b>n = 179</b>        |
| Mean number of ICH characteristics        | 3.2 (2.8, 3.5) **     | 3.5 (3.4, 3.7) *    | 3.8 (3.6, 3.9)        |
| 5 or more ICH characteristics             | 12.5 (3.9, 21.1) *    | 18.8 (13.8, 23.8) * | 29.0 (21.2, 36.9)     |
| All 4 ICH – Health Behaviours             | 1.5 (0, 3.7)          | 0.6 (0, 1.3) *      | 4.1 (0.6, 7.6)        |
| All 4 ICH – Health Factors                | 5.7 (0, 11.5) *       | 18.1 (11.7, 24.4)   | 21.4 (13.2, 29.6)     |
| Normal Blood Pressure (<120/80 mmHg)      | 14.1 (5.9, 22.4) ***  | 38.3 (31.5, 45.2)   | 41.5 (34.2, 48.8)     |
| Normal BMI (<25 kg/m <sup>2</sup> )       | 26.0 (16.7, 35.4)     | 21.2 (16.0, 26.4)   | 25.2 (17.5, 33.0)     |
| Normal Glucose (<5.6 mmol/l)              | 42.4 (29.5, 55.2) *   | 55.0 (47.3, 62.7)   | 58.0 (48.4, 67.7)     |
| Normal Cholesterol (<5.2 mmol/l)          | 63.5 (51.1, 75.9) *   | 78.8 (73.4, 84.3)   | 78.5 (70.1, 86.9)     |
| Physical Activity ≥150 min/week           | 52.6 (39.1, 66.2)     | 52.3 (44.9, 59.7)   | 50.2 (42.6, 57.7)     |
| Healthy Diet (≥3 of four dietary factors) | 24.5 (15.2, 33.8)     | 16.5 (11.7, 21.3) * | 26.9 (20.8, 33.0)     |
| Current Non-Smoker                        | 93.5 (87.2, 100.0)    | 90.3 (85.6, 94.9)   | 95.2 (90.5, 99.9)     |

Values reported are given as percentages with 95% confidence intervals in brackets except for mean number of ICH characteristics which is given as number with 95% CI in brackets

ICH = ideal cardiovascular health; ICH includes 7 characteristics (current non-smoking, healthy diet, moderate physical activity, and normal body mass index, blood pressure, glucose, and cholesterol)

ICH – Health Behaviours include adequate physical activity, non-smoker, normal BMI and healthy diet; ICH Health Factors include normal blood pressure, normal glucose, normal cholesterol and current-non-smoker). Healthy diet defined as meeting 3 or 4 of criteria: (1) adequate fruit and vegetable intake, (2) adequate fish intake (3) low salt diet, (4) low sugar sweetened beverage consumption

\*p<0.05; \*\*p<0.01; \*\*\*p<0.001 for difference in proportion compared to the 'More than High School' Education

**Table S5: Odds Ratio for  $\geq 5$  Ideal Cardiovascular Health Characteristics among of Urban Participants in Jamaica Health and Lifestyle Survey using multilevel models**

| Characteristic                     | Males              |         | Females            |         |
|------------------------------------|--------------------|---------|--------------------|---------|
|                                    | OR (95% CI)        | p-value | OR (95% CI)        | p-value |
| Median Land Value                  |                    |         |                    |         |
| Upper Tertile (>2 – 9 million JMD) | 1.0                |         | 1.0                |         |
| Middle Tertile (1-2 million JMD)   | 0.61 (0.29 – 1.28) | 0.188   | 0.72 (0.41 – 1.24) | 0.240   |
| Lower Tertile (<1 million JMD)     | 0.47 (0.21 – 1.05) | 0.067   | 0.59 (0.33 – 1.05) | 0.071   |
| Household Assets                   |                    |         |                    |         |
| Upper Tertile (13-22 items)        | 1.0                |         | 1.0                |         |
| Middle Tertile (10-12 items)       | 1.65 (0.77 – 3.53) | 0.197   | 1.10 (0.59 – 2.02) | 0.769   |
| Lower Tertile ( $\leq 9$ items)    | 1.08 (0.48 – 2.45) | 0.856   | 1.08 (0.59 – 1.97) | 0.802   |
| Education Category                 |                    |         |                    |         |
| More than High School              | 1.0                |         | 1.0                |         |
| High School                        | 2.16 (0.94 – 4.96) | 0.069   | 0.60 (0.36 – 1.00) | 0.050   |
| Less than High School              | 2.01 (0.67 – 6.03) | 0.214   | 0.57 (0.25 – 1.27) | 0.171   |
| Age (years)                        | 0.97 (0.95 – 0.99) | 0.002   | 0.97 (0.95 – 0.98) | <0.001  |

Separate models created for males and female participants in two level multi-level model with individuals nested in communities and using multiple imputation to account for missing data. The model for males included 349 participants while the model for females included 637 participants.



**Table S6: Regression coefficients for Number of Ideal Cardiovascular Health Characteristics among of Urban Participants in Jamaica Health and Lifestyle Survey (ANCOVA models)**

| Characteristic                     | Males                |         | Females              |         |
|------------------------------------|----------------------|---------|----------------------|---------|
|                                    | OR (95% CI)          | p-value | OR (95% CI)          | p-value |
| Median Land Value                  |                      |         |                      |         |
| Upper Tertile (>2 – 9 million JMD) | Referent             |         | Referent             |         |
| Middle Tertile (1-2 million JMD)   | -0.36 (-0.82, 0.09)  | 0.116   | 0.01 (-0.27, 0.28)   | 0.968   |
| Lower Tertile (<1 million JMD)     | -0.57 (-0.99, -0.15) | 0.008   | 0.17 (-0.26, 0.30)   | 0.901   |
| Household Assets                   |                      |         |                      |         |
| Upper Tertile (13-22 items)        | Referent             |         | Referent             |         |
| Middle Tertile (10-12 items)       | 0.10 (-0.50, 0.70)   | 0.737   | 0.05 (-0.22, 0.32)   | 0.728   |
| Lower Tertile ( $\leq 9$ items)    | -0.07 (-0.64, 0.52)  | 0.821   | -0.08 (-0.31, 0.15)  | 0.504   |
| Education Category                 |                      |         |                      |         |
| More than High School              | Referent             |         | Referent             |         |
| High School                        | 0.46 (-0.07, 0.98)   | 0.087   | -0.27 (-0.49, -0.05) | 0.016   |
| Less than High School              | 0.32 (-0.34, 0.98)   | 0.333   | -0.34 (-0.74, 0.07)  | 0.101   |
| Age (years)                        | -0.02 (-0.03, -0.01) | 0.001   | -0.02 (-0.03, -0.01) | 0.001   |

Separate models created for males and female participants in ANCOVA model weighted for survey design and using multiple imputation to account for missing data. The model for males included 360 participants while the model for females included 665 participants.

**Table S7: Odds Ratio for ≥5 Ideal Cardiovascular Health Characteristics among of Urban Participants in Jamaica Health and Lifestyle Survey (multivariable models using complete cases only)**

| Characteristic                     | Males               |         | Females              |         |
|------------------------------------|---------------------|---------|----------------------|---------|
|                                    | OR (95% CI)         | p-value | OR (95% CI)          | p-value |
| Median Land Value                  |                     |         |                      |         |
| Upper Tertile (>2 – 9 million JMD) | 1.0                 |         | 1.0                  |         |
| Middle Tertile (1-2 million JMD)   | 0.40 (0.16 – 1.01)  | 0.053   | 0.61 (0.19 – 1.94)   | 0.403   |
| Lower Tertile (<1 million JMD)     | 0.37 (0.12 – 1.11)  | 0.078   | 0.91 (0.33 – 2.51)   | 0.859   |
| Household Assets                   |                     |         |                      |         |
| Upper Tertile (13-22 items)        | 1.0                 |         | 1.0                  |         |
| Middle Tertile (10-12 items)       | 2.01 (0.93 – 4.72)  | 0.073   | 1.29 (0.68 – 2.40)   | 0.427   |
| Lower Tertile (≤ 9 items)          | 1.34 (0.451 – 4.00) | 0.598   | 1.12 (0.61 – 2.06)   | 0.720   |
| Education Category                 |                     |         |                      |         |
| More than High School              | 1.0                 |         | 1.0                  |         |
| High School                        | 3.19 (0.89 – 11.44) | 0.032   | 0.79 (0.41 – 0.1.50) | 0.463   |
| Less than High School              | 4.87 (1.15 – 20.64) | 0.075   | 1.12 (0.46 – 2.72)   | 0.806   |
| Age (years)                        | 0.95 (0.92 – 0.99)  | 0.018   | 0.96 (0.93 – 0.99)   | 0.007   |

Separate models created for males and female participants in logistic regression models weighted for survey design with listwise deletion of missing data. The model for males included 336 participants while the model for females included 602 participants.

**Table S8: Prevalence of Ideal Cardiovascular Health if Various Population**

| First Author (year published) | Population                 | Sample Size             | Age group       | Prevalence of all 7 characteristics | Prevalence of all 6- 7 characteristics | Prevalence of all ≥5 characteristics |
|-------------------------------|----------------------------|-------------------------|-----------------|-------------------------------------|----------------------------------------|--------------------------------------|
| Harrison (2019)               | Quebec                     | 777                     | 18-65 years     | 0.5                                 | 16.2                                   | 36.9                                 |
| Jankovic (2019)               | Serbia                     | 13,100                  | ≥20 years       | 0.1%                                | 4.1                                    | 19.9                                 |
| Zeng (2012)                   | China (urban)              | 9962                    | ≥20 – 85 years  | 0.5                                 | 6.4                                    | 26.9                                 |
| Kim (2013)                    | New Ulm, Minnesota         | 4754                    |                 | 1.0                                 | 7.5                                    | 21.9                                 |
| Short (2013)                  | Mississippi                | 2003 Black, 5,125 White | ≥18 years       | 1.3 (Black)<br>2.6 (White)          | -                                      | -                                    |
| Moghaddam (2014)              | Tehran                     | 2,861 women, 2,004 men  | ≥20 years       | One woman<br>No men                 | -                                      | 19.7 (women)<br>10.3 (men)           |
| Lu (2015)                     | China (southeast)          | 11,996                  | ≥20 years       | 1.1                                 | 8.9                                    | 27.6                                 |
| Djousse' (2015)               | Mississippi (Jackson)      | 4132                    | Mean 55.3 years | 0 (men)<br>0 (women)                | 0.3 (men)<br>0.6 (women)               | 3.9 (men)<br>4.3 (women)             |
| Gupta (2015)                  | India                      | 6198                    | 20-75 years     | 0.1 (men)<br>0.1 (women)            | 2.5 (men)<br>3.6 (women)               | 15.1 (men)<br>21.3 (women)           |
| Valasquez (2015)              | Brazil                     | 34,362                  | ≥18 years       | 0.34                                | -                                      | -                                    |
| Younis (2016)                 | USA (review of 14 studies) | -                       | -               | -                                   | 0.3 - 15%                              | -                                    |
| Empana (2016)                 | Paris                      | 8916                    | 5-75            | -                                   | -                                      | 9.98                                 |
| Ren (2016)                    | China (Shandong)           | 7683 men<br>7667 women  | 18-69           | 0.05                                | 2.95                                   | 23.3                                 |
| Benziger (2018)               | Peru                       | 3058                    | ≥35             | 0                                   | -                                      | 12.7                                 |
| Seron (2018)                  | Argentina, Chile, Uruguay  | 5458                    | 35-75           | 0.1                                 | -                                      | 8.5%                                 |
| van Nieuwenhuizen (2018)      | Ghana                      | 3510                    | 20-70           | 0.3                                 | -                                      | 25.2 (women)<br>27.0 (men)           |
